# Supplementary material for: A Systematic Review of Reported Cost for Smear and Culture Tests during Multidrug-Resistant Tuberculosis Treatment
Source: PLOS journal article supplement (doi:10.1371/journal.pone.0056074), 2013-02-15
Supplement: S2 (10.1371/journal.pone.0056074.s002) [file journal.pone.0056074.s002]

| Test | Northeastern  (Liaoning) | Southwestern  (Guizhou) | Northwestern  (Shanxi) | South China  (Shenzhen) | North China  (Beijing) | East China  (Shaoxing) | Average |
| --- | --- | --- | --- | --- | --- | --- | --- |
| Smear test alone | 2.27 | 1.51 | 0.76 | 1.72 | 3.02 | 1.21 | 1.75 |
| Culture test alone | 6.04 | 7.55 | 7.55 | 10.57 | 9.06 | 18.12 | 9.82 |

**Table S2.** Cost for smear/culture in different regions in China (2010 USD)[15]
